# Supplementary material for: Macrophages mediate colon carcinoma cell adhesion in the rat liver after exposure to lipopolysaccharide
Source: PubMed Central journal article supplement — Oncoimmunology. 2012 Dec 1;1(9):1517–26. doi: 10.4161/onci.22303 (PMC3525607; doi:10.4161/onci.22303), 2012-12-01
Supplement: onci-1-1517-s01.pdf [file onci-1-1517-s01.pdf]

## **Supplemental Material to:**

**Nuray Gül, Simran Grewal, Marijn Bögels, Gerben J. van der Bij, Malika M.A. Koppes, Steven J. Oosterling, Donna M. Fluitsma, Kees A. Hoeben, Robert H. J. Beelen, Marjolein van Egmond**

**Macrophages mediate colon carcinoma cell adhesion in the rat liver after exposure to lipopolysaccharide**

**Oncoimmunology 2012; 1(9)**

**<http://dx.doi.org/10.4161/onci.22303>**

**<http://www.landesbioscience.com/journals/oncoimmunology/article/22303/>**

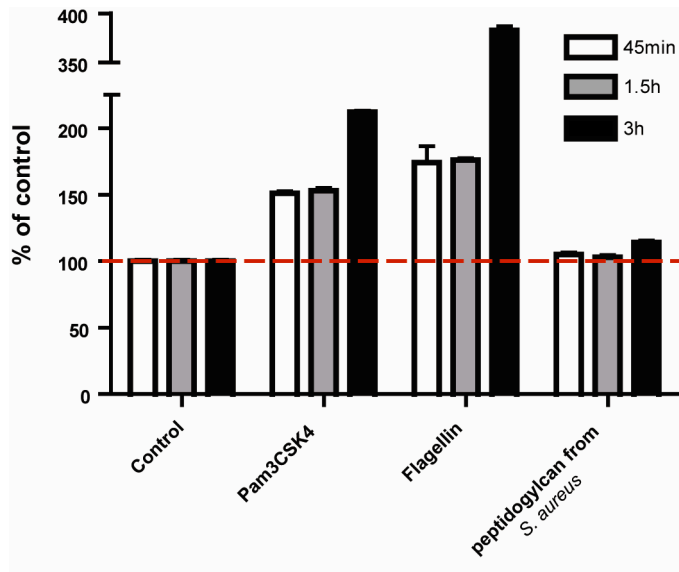

**Supplemental figure 1:** Intracellular ROS levels in macrophages after treatment with control medium, 50  $\mu\text{g/ml}$  Pam3CSK4 (TLR1/2 ligand), 5 $\mu\text{g/ml}$  flagellin (TLR5 ligand), or 50  $\mu\text{g/ml}$  peptidoglycan from *S. aureus* (TLR2 ligand).

## **Supplemental material and methods**

### **Bone marrow -derived macrophages**

Bone marrow was harvested from freshly isolated femur, tibia and humerus from Wag/Rij rats. After removal of connective tissues and muscles, bone marrow was flushed and single cell suspensions were made by passing bone marrow through sterile 70  $\mu\text{m}$  filters (BD Falcon, Bedford, MA). Macrophages differentiation was induced by incubating bone marrow cells for 7 days with complete DMEM supplemented with 15% L929 conditioned medium (containing macrophage-colony stimulating factor). Macrophages were harvested by 15 minutes incubation with trypsin-EDTA and subsequent scraping with a cell scraper. Macrophages were seeded in 96-well plates ( $2 \times 10^5$ / well; Corning Incorporated, NY) for experiments.

### **ROS measurement**

Macrophages were incubated with control medium HBSS or ligands for Toll-like receptors (50  $\mu\text{g/ml}$  Pam3CSK4, 5  $\mu\text{g/ml}$  flagellin, and 50  $\mu\text{g/ml}$  peptidoglycan from *S. Aureus*) for 45 minutes, 1.5 hour or 3 hours. After washing 10  $\mu\text{M}$  CM-H<sub>2</sub>DCFDA (Molecular Probes, Breda, The Netherlands), reflecting intracellular ROS levels, was added and cell were incubated for 1 hour in the incubator whereafter fluorescence was measured (485 nm excitation/520 nm emission filters; Fluostar Galaxy, BMG Labtechnologies, Offenburg, Germany).
